# Supplementary material for: Therapeutic deep brain stimulation disrupts movement-related subthalamic nucleus activity in parkinsonian mice
Source: eLife journal article supplement (doi:10.7554/elife.75253), 2022-07-04
Supplement: supp [file elife_poa_e75253_Transparent_Reporting_File.docx]

***eLife’s* transparent reporting form**

We encourage authors to provide detailed information *within their submission* to facilitate the interpretation and replication of experiments. Authors can upload supporting documentation to indicate the use of appropriate reporting guidelines for health-related research (see [EQUATOR Network](http://www.equator-network.org/%20)), life science research (see the [BioSharing Information Resource](https://biosharing.org/" \t "_blank)), or the [ARRIVE guidelines](http://www.plosbiology.org/article/info:doi/10.1371/journal.pbio.1000412) for reporting work involving animal research. Where applicable, authors should refer to any relevant reporting standards documents in this form.

If you have any questions, please consult our Journal Policies and/or contact us: [editorial@elifesciences.org](mailto:editorial@elifesciences.org).

**Sample-size estimation**

- You should state whether an appropriate sample size was computed when the study was being designed
- You should state the statistical method of sample size computation and any required assumptions
- If no explicit power analysis was used, you should describe how you decided what sample (replicate) size (number) to use

Please outline where this information can be found within the submission (e.g., sections or figure legends), or explain why this information doesn’t apply to your submission:

Sample size was estimated prior to experiments being performed, and is discussed in the Methods section under a section titled “Sample Size Determination, Quanitification, Statistical Analysis, and Replication”. We used non-parametric statistical tests, were aiming for 90% power, with a two-sided alpha of 0.05. For in vivo experiments, effect sizes for power calculations were estimated from small pilot studies. For ex vivo experiments, effect sizes for power calculations were estimated from similar experiments performed in the lab.

**Replicates**

- You should report how often each experiment was performed
- You should include a definition of biological versus technical replication
- The data obtained should be provided and sufficient information should be provided to indicate the number of independent biological and/or technical replicates
- If you encountered any outliers, you should describe how these were handled
- Criteria for exclusion/inclusion of data should be clearly stated
- High-throughput sequence data should be uploaded before submission, with a private link for reviewers provided (these are available from both GEO and ArrayExpress)

Please outline where this information can be found within the submission (e.g., sections or figure legends), or explain why this information doesn’t apply to your submission:

Information regarding replication is included in the Methods section under the heading “Sample Size Determination, Quanitification, Statistical Analysis, and Replication”. Other details regarding sampling and signal analysis is included under each method heading, eg “Fiber Photometry”. Inclusion/exclusion criteria and the numbers of excluded animals is included in the Methods section under the heading “Inclusion/Exclusion Criteria”.

**Statistical reporting**

- Statistical analysis methods should be described and justified
- Raw data should be presented in figures whenever informative to do so (typically when N per group is less than 10)
- For each experiment, you should identify the statistical tests used, exact values of N, definitions of center, methods of multiple test correction, and dispersion and precision measures (e.g., mean, median, SD, SEM, confidence intervals; and, for the major substantive results, a measure of effect size (e.g., Pearson's r, Cohen's d)
- Report exact p-values wherever possible alongside the summary statistics and 95% confidence intervals. These should be reported for all key questions and not only when the p-value is less than 0.05.

Please outline where this information can be found within the submission (e.g., sections or figure legends), or explain why this information doesn’t apply to your submission:

We have included a table at the end of the manuscript which for each figure panel provides the statistical test used, the F, and p values. Effect sizes (Cohen’s d) for significant findings in the main figures are noted in this table, as well. Exact p values are also included in the Results text, and indicators of significant p values are on some figure panels (*) for clarity and defined in the figure legends. All the data (from all individual subjects) are shown in most figures, with summary data adjacent, underneath, or in the supplementary figures. N is also noted in Figure legends.

(For large datasets, or papers with a very large number of statistical tests, you may upload a single table file with tests, Ns, etc., with reference to sections in the manuscript.)

**Group allocation**

- Indicate how samples were allocated into experimental groups (in the case of clinical studies, please specify allocation to treatment method); if randomization was used, please also state if restricted randomization was applied
- Indicate if masking was used during group allocation, data collection and/or data analysis

Please outline where this information can be found within the submission (e.g., sections or figure legends), or explain why this information doesn’t apply to your submission:

Group allocation, including randomization and blinding, are described in Methods under the heading “Group Allocation and Blinding”.

**Additional data files (“source data”)**

- We encourage you to upload relevant additional data files, such as numerical data that are represented as a graph in a figure, or as a summary table
- Where provided, these should be in the most useful format, and they can be uploaded as “Source data” files linked to a main figure or table
- Include model definition files including the full list of parameters used
- Include code used for data analysis (e.g., R, MatLab)
- Avoid stating that data files are “available upon request”

Please indicate the figures or tables for which source data files have been provided:

Source data can be found on Dryad: doi:10.7272/Q60P0X95
